# Supplementary material for: Tosylhydrazine-promoted self-conjugate reduction–Michael/aldol reaction of 3-phenacylideneoxindoles towards dispirocyclopentanebisoxindole derivatives
Source: publisher site journal article supplement (doi:10.3762/bjoc.18.49), 2022-04-27

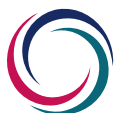

## Supporting Information

for

### **Tosylhydrazine-promoted self-conjugate reduction–Michael/aldol reaction of 3-phenacylideneoxindoles towards dispirocyclopentanebisoxindole derivatives**

Sayan Pramanik and Chhanda Mukhopadhyay

*Beilstein J. Org. Chem.* **2022**, *18*, 469–478. [doi:10.3762/bjoc.18.49](https://doi.org/10.3762/bjoc.18.49)

**Check-CIF-file for compound 3g**

# checkCIF/PLATON report

Structure factors have been supplied for datablock(s) S\_a

THIS REPORT IS FOR GUIDANCE ONLY. IF USED AS PART OF A REVIEW PROCEDURE FOR PUBLICATION, IT SHOULD NOT REPLACE THE EXPERTISE OF AN EXPERIENCED CRYSTALLOGRAPHIC REFEREE.

No syntax errors found.      CIF dictionary      Interpreting this report

## Datablock: S\_a

---

Bond precision:    C-C = 0.0035 A                      Wavelength=0.71073

Cell:              a=13.790(4)              b=15.024(5)              c=15.179(5)  
                    alpha=90.003(4)          beta=102.176(4)          gamma=90.014(4)

Temperature:      296 K

|                | Calculated    | Reported      |
|----------------|---------------|---------------|
| Volume         | 3074.1(17)    | 3074.0(16)    |
| Space group    | P -1          | P -1          |
| Hall group     | -P 1          | -P 1          |
| Moiety formula | C38 H36 N2 O4 | ?             |
| Sum formula    | C38 H36 N2 O4 | C76 H70 N4 O8 |
| Mr             | 584.69        | 1167.36       |
| Dx,g cm-3      | 1.263         | 1.261         |
| Z              | 4             | 2             |
| Mu (mm-1)      | 0.082         | 0.082         |
| F000           | 1240.0        | 1236.0        |
| F000'          | 1240.54       |               |
| h,k,lmax       | 16,17,17      | 15,17,17      |
| Nref           | 10307         | 9977          |
| Tmin,Tmax      | 0.994,0.998   | 0.763,0.846   |
| Tmin'          | 0.990         |               |

Correction method= # Reported T Limits: Tmin=0.763 Tmax=0.846  
AbsCorr = MULTI-SCAN

Data completeness= 0.968                      Theta(max)= 24.563

R(reflections)= 0.0626( 7141)              wR2(reflections)= 0.1769( 9977)

S = 0.942                                      Npar= 803

---

The following ALERTS were generated. Each ALERT has the format

**test-name\_ALERT\_alert-type\_alert-level.**

Click on the hyperlinks for more details of the test.

---

**Alert level B**

PLAT112\_ALERT\_2\_B ADDSYM Detects New (Pseudo) Symm. Elem a 100 %Fit  
PLAT113\_ALERT\_2\_B ADDSYM Suggests Possible Pseudo/New Space Group P21/c Check

---

**Alert level C**

ABSTY02\_ALERT\_1\_C An \_exptl\_absorpt\_correction\_type has been given without  
a literature citation. This should be contained in the  
\_exptl\_absorpt\_process\_details field.  
Absorption correction given as multi-scan

RINTA01\_ALERT\_3\_C The value of Rint is greater than 0.12  
Rint given 0.147

THETM01\_ALERT\_3\_C The value of sine(theta\_max)/wavelength is less than 0.590  
Calculated sin(theta\_max)/wavelength = 0.5849

PLAT029\_ALERT\_3\_C \_diffrn\_measured\_fraction\_theta\_full value Low . 0.968 Why?  
PLAT041\_ALERT\_1\_C Calc. and Reported SumFormula Strings Differ Please Check  
PLAT043\_ALERT\_1\_C Calculated and Reported Mol. Weight Differ by .. 1.01 Check  
PLAT068\_ALERT\_1\_C Reported F000 Differs from Calcd (or Missing)... Please Check  
PLAT220\_ALERT\_2\_C NonSolvent Resd 1 C Ueq(max)/Ueq(min) Range 3.4 Ratio  
PLAT220\_ALERT\_2\_C NonSolvent Resd 2 C Ueq(max)/Ueq(min) Range 3.3 Ratio  
PLAT222\_ALERT\_3\_C NonSolvent Resd 1 H Uiso(max)/Uiso(min) Range 4.3 Ratio  
PLAT222\_ALERT\_3\_C NonSolvent Resd 2 H Uiso(max)/Uiso(min) Range 4.1 Ratio  
PLAT250\_ALERT\_2\_C Large U3/U1 Ratio for Average U(i,j) Tensor .... 2.2 Note  
PLAT905\_ALERT\_3\_C Negative K value in the Analysis of Variance ... -1.590 Report  
PLAT911\_ALERT\_3\_C Missing FCF Refl Between Thmin & STh/L= 0.585 312 Report

---

**Alert level G**

FORMU01\_ALERT\_2\_G There is a discrepancy between the atom counts in the  
\_chemical\_formula\_sum and the formula from the \_atom\_site\* data.  
Atom count from \_chemical\_formula\_sum: C76 H70 N4 O8  
Atom count from the \_atom\_site data: C76 H72 N4 O8

CELLZ01\_ALERT\_1\_G Difference between formula and atom\_site contents detected.  
CELLZ01\_ALERT\_1\_G ALERT: Large difference may be due to a  
symmetry error - see SYMMG tests  
From the CIF: \_cell\_formula\_units\_Z 2  
From the CIF: \_chemical\_formula\_sum C76 H70 N4 O8  
TEST: Compare cell contents of formula and atom\_site data

| atom | Z*formula | cif sites | diff  |
|------|-----------|-----------|-------|
| C    | 152.00    | 152.00    | 0.00  |
| H    | 140.00    | 144.00    | -4.00 |
| N    | 8.00      | 8.00      | 0.00  |
| O    | 16.00     | 16.00     | 0.00  |

PLAT007\_ALERT\_5\_G Number of Unrefined Donor-H Atoms ..... 2 Report  
PLAT020\_ALERT\_3\_G The Value of Rint is Greater Than 0.12 ..... 0.147 Report  
PLAT045\_ALERT\_1\_G Calculated and Reported Z Differ by a Factor ... 2.00 Check  
PLAT154\_ALERT\_1\_G The s.u.'s on the Cell Angles are Equal ..(Note) 0.004 Degree  
PLAT793\_ALERT\_4\_G Model has Chirality at C5 (Centro SPGR) R Verify  
PLAT793\_ALERT\_4\_G Model has Chirality at C6 (Centro SPGR) R Verify  
PLAT793\_ALERT\_4\_G Model has Chirality at C7 (Centro SPGR) R Verify  
PLAT793\_ALERT\_4\_G Model has Chirality at C17 (Centro SPGR) R Verify  
PLAT793\_ALERT\_4\_G Model has Chirality at C43 (Centro SPGR) R Verify  
PLAT793\_ALERT\_4\_G Model has Chirality at C44 (Centro SPGR) R Verify  
PLAT793\_ALERT\_4\_G Model has Chirality at C45 (Centro SPGR) R Verify  
PLAT793\_ALERT\_4\_G Model has Chirality at C53 (Centro SPGR) R Verify  
PLAT883\_ALERT\_1\_G No Info/Value for \_atom\_sites\_solution\_primary . Please Do !  
PLAT909\_ALERT\_3\_G Percentage of I>2sig(I) Data at Theta(Max) Still 49% Note  
PLAT941\_ALERT\_3\_G Average HKL Measurement Multiplicity ..... 2.1 Low  
PLAT965\_ALERT\_2\_G The SHELXL WEIGHT Optimisation has not Converged Please Check  
PLAT978\_ALERT\_2\_G Number C-C Bonds with Positive Residual Density. 3 Info

---

0 **ALERT level A** = Most likely a serious problem - resolve or explain  
2 **ALERT level B** = A potentially serious problem, consider carefully  
14 **ALERT level C** = Check. Ensure it is not caused by an omission or oversight  
21 **ALERT level G** = General information/check it is not something unexpected

9 ALERT type 1 CIF construction/syntax error, inconsistent or missing data  
8 ALERT type 2 Indicator that the structure model may be wrong or deficient  
10 ALERT type 3 Indicator that the structure quality may be low  
8 ALERT type 4 Improvement, methodology, query or suggestion  
2 ALERT type 5 Informative message, check

---

## Validation response form

Please find below a validation response form (VRF) that can be filled in and pasted into your CIF.

```
# start Validation Reply Form
_vrf_ABSTY02_S_a
;
PROBLEM: An _exptl_absorpt_correction_type has been given without
RESPONSE: ...
;
_vrf_RINTA01_S_a
;
PROBLEM: The value of Rint is greater than 0.12
RESPONSE: ...
;
_vrf_THETM01_S_a
;
PROBLEM: The value of sine(theta_max)/wavelength is less than 0.590
RESPONSE: ...
;
_vrf_PLAT112_S_a
;
PROBLEM: ADDSYM Detects New (Pseudo) Symm. Elem          a          100 %Fit
RESPONSE: ...
;
_vrf_PLAT113_S_a
;
PROBLEM: ADDSYM Suggests Possible Pseudo/New Space Group      P21/c Check
RESPONSE: ...
;
_vrf_PLAT029_S_a
;
PROBLEM: _diffn_measured_fraction_theta_full value Low .      0.968 Why?
RESPONSE: ...
;
_vrf_PLAT041_S_a
;
PROBLEM: Calc. and Reported SumFormula Strings Differ      Please Check
RESPONSE: ...
;
_vrf_PLAT043_S_a
;
PROBLEM: Calculated and Reported Mol. Weight Differ by ..      1.01 Check
RESPONSE: ...
;
_vrf_PLAT068_S_a
```

```

;
PROBLEM: Reported F000 Differs from Calcd (or Missing)...      Please Check
RESPONSE: ...
;
_vrf_PLAT220_S_a
;
PROBLEM: NonSolvent   Resd 1  C   Ueq(max)/Ueq(min) Range      3.4 Ratio
RESPONSE: ...
;
_vrf_PLAT222_S_a
;
PROBLEM: NonSolvent Resd 1  H   Uiso(max)/Uiso(min) Range      4.3 Ratio
RESPONSE: ...
;
_vrf_PLAT250_S_a
;
PROBLEM: Large U3/U1 Ratio for Average U(i,j) Tensor ....    2.2 Note
RESPONSE: ...
;
_vrf_PLAT905_S_a
;
PROBLEM: Negative K value in the Analysis of Variance ...     -1.590 Report
RESPONSE: ...
;
_vrf_PLAT911_S_a
;
PROBLEM: Missing FCF Refl Between Thmin & STh/L=      0.585      312 Report
RESPONSE: ...
;
# end Validation Reply Form

```

---

It is advisable to attempt to resolve as many as possible of the alerts in all categories. Often the minor alerts point to easily fixed oversights, errors and omissions in your CIF or refinement strategy, so attention to these fine details can be worthwhile. In order to resolve some of the more serious problems it may be necessary to carry out additional measurements or structure refinements. However, the purpose of your study may justify the reported deviations and the more serious of these should normally be commented upon in the discussion or experimental section of a paper or in the "special\_details" fields of the CIF. checkCIF was carefully designed to identify outliers and unusual parameters, but every test has its limitations and alerts that are not important in a particular case may appear. Conversely, the absence of alerts does not guarantee there are no aspects of the results needing attention. It is up to the individual to critically assess their own results and, if necessary, seek expert advice.

### **Publication of your CIF in IUCr journals**

A basic structural check has been run on your CIF. These basic checks will be run on all CIFs submitted for publication in IUCr journals (*Acta Crystallographica*, *Journal of Applied Crystallography*, *Journal of Synchrotron Radiation*); however, if you intend to submit to *Acta Crystallographica Section C* or *E* or *IUCrData*, you should make sure that full publication checks are run on the final version of your CIF prior to submission.

### **Publication of your CIF in other journals**

Please refer to the *Notes for Authors* of the relevant journal for any special instructions relating to CIF submission.

PLATON version of 05/12/2020; check.def file version of 05/12/2020

Datablock S\_a - ellipsoid plot

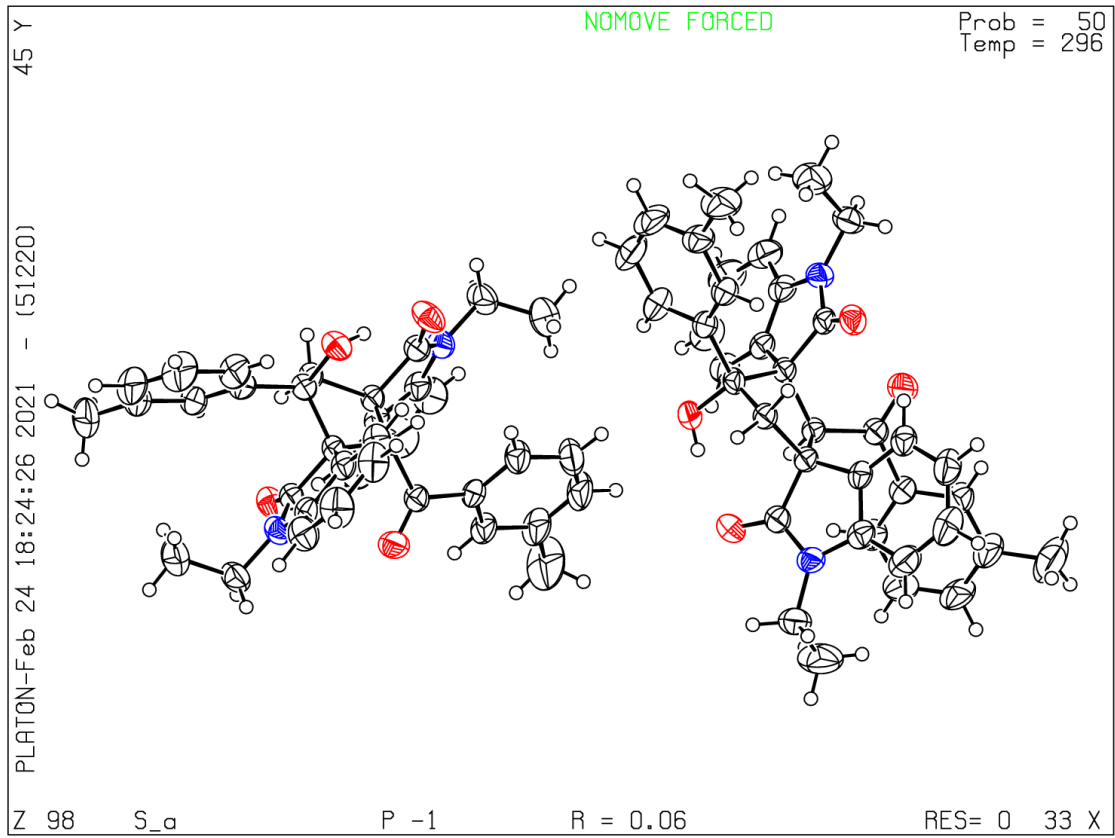

Supplement: Additional file 3 [file 1860-5397-18-49-S3.pdf]
